# Supplementary material for: Property Modulation of Graphene Oxide Incorporated with TiO2 for Dye-Sensitized Solar Cells
Source: PubMed Central journal article supplement — ACS Omega. 2022 Nov 18;7(48):44170–9. doi: 10.1021/acsomega.2c05637 (PMC9730474; doi:10.1021/acsomega.2c05637), 2022-11-18
Supplement: ao2c05637_si_001.pdf [file ao2c05637_si_001.pdf]

# Property Modulation of Graphene Oxide Incorporated with TiO<sub>2</sub> for Dye-Sensitized Solar Cells

Amanpal Singh<sup>1,\*</sup>, Yogesh Kumar Saini<sup>1</sup>, Anuj Kumar<sup>2</sup>, Sanjeev Gautam<sup>3</sup>, Dinesh Kumar<sup>4</sup>,  
Viresh Dutta<sup>5</sup>, Han-koo Lee<sup>6</sup>, Jongsu Lee<sup>7</sup>, Sanjay Kumar Swami<sup>7,\*</sup>

<sup>1</sup>Department of Physics, University of Rajasthan, Jaipur- 302004, India

<sup>2</sup>Department of Physics, J.C. Bose University of Science and Technology, YMCA, Faridabad, Haryana-121006, India

<sup>3</sup>Advanced Functional Materials Lab., Dr S. S. Bhatnagar University Institute of Chemical Engineering & Technology, Panjab University, Chandigarh-160014, India

<sup>4</sup>Gurugram University, Gurugram-122003, Haryana, India

<sup>5</sup>Photovoltaic Lab, Department of Energy Science and Engineering, Indian Institute of Technology Delhi, Hauz Khas, New Delhi-110016, India

<sup>6</sup>Pohang Accelerator Lab., POSTECH, Republic of Korea

<sup>7</sup>Department of Advanced Components and Materials Engineering, Suncheon National University, Suncheon 57922, Republic of Korea

## Supporting Information

Table S1 shows the photovoltaic performance of dye-sensitized solar cells (DSSCs) with GO synthesized by different techniques, as reported in the literature.

**Table S1. State of the art of rGO used in TiO<sub>2</sub> layer in DSSC.**

| Authors                  | Deposition/<br>Synthesis process     | Photoanode                                             | DSSC parameters                                                                                                                                                                                                               | Covered<br>(Positives)                                                                                                                                                                                      | Ref. |
|--------------------------|--------------------------------------|--------------------------------------------------------|-------------------------------------------------------------------------------------------------------------------------------------------------------------------------------------------------------------------------------|-------------------------------------------------------------------------------------------------------------------------------------------------------------------------------------------------------------|------|
| Mustafa et. al. (2021)   | electrodeposition method             | rGO-TiO <sub>2</sub> compact layer                     | <ul style="list-style-type: none"> <li>• <math>J_{SC} = 14.07 \text{ mA cm}^{-2}</math></li> <li>• <math>V_{OC} = 0.63 \text{ V}</math></li> <li>• <math>FF = 32.60\%</math></li> <li>• <math>PCE = 2.89\%</math></li> </ul>  | <ul style="list-style-type: none"> <li>• suppressed the dark current</li> <li>• longest electron lifetime</li> <li>• highest charge collection efficiency</li> </ul>                                        | 1    |
| P. Makal et. al. (2021)  | hydrothermal method                  | rGO-TiO <sub>2</sub> -bronze nanowire composites       | <ul style="list-style-type: none"> <li>• <math>J_{SC} = 10.41 \text{ mA cm}^{-2}</math></li> <li>• <math>V_{OC} = 0.71 \text{ V}</math></li> <li>• <math>FF = 67\%</math></li> <li>• <math>PCE = 4.95\%</math></li> </ul>     | <ul style="list-style-type: none"> <li>• lower interfacial resistance against charge transport</li> <li>• improve the specific surface area</li> <li>• enhance visible light absorption capacity</li> </ul> | 2    |
| M. Dhonde et. al. (2021) | sol-gel-assisted hydrothermal method | Cu-doped TiO <sub>2</sub> /graphene (CuTGR) composites | <ul style="list-style-type: none"> <li>• <math>J_{SC} = 19.93 \text{ mA cm}^{-2}</math></li> <li>• <math>V_{OC} = 0.745 \text{ V}</math></li> <li>• <math>FF = 66.04\%</math></li> <li>• <math>PCE = 9.81\%</math></li> </ul> | <ul style="list-style-type: none"> <li>• improved current density</li> <li>• faster charge transport</li> </ul>                                                                                             | 3    |
| Y. He et. al. (2020)     | physical mixture process             | Optimized Uio-66-rGO/TiO <sub>2</sub>                  | <ul style="list-style-type: none"> <li>• <math>J_{SC} = 18.6 \text{ mA cm}^{-2}</math></li> <li>• <math>V_{OC} = 0.67 \text{ V}</math></li> <li>• <math>FF = 60.8\%</math></li> <li>• <math>PCE = 7.67\%</math></li> </ul>    | <ul style="list-style-type: none"> <li>• significant enhancement of the BET area</li> <li>• improve incident photon to electron efficiency</li> </ul>                                                       | 4    |

\* Corresponding Author: Dr. Amanpal Singh ([amanbkn@gmail.com](mailto:amanbkn@gmail.com))  
Dr. Sanjay Kumar Swami ([swami.phy@gmail.com](mailto:swami.phy@gmail.com))

**Characterizations Techniques.** X-ray diffraction (XRD) measurement was performed by XPERT-PRO diffractometer from Panalytical PW3050/60 working with Cu K $\alpha$  ( $\lambda = 1.54060 \text{ \AA}$ ). These films were also investigated by Raman spectroscopy (micro-Raman STR500Airix) using a He-Ne laser of 638 nm wavelength. High-resolution X-ray photoelectron spectroscopy (XPS) analysis was carried out using SCIENTA ECSA 300 equipped with monochromatic Al K $\alpha$  (photon energy= 1486.6 eV) X-ray source. Soft X-ray absorption spectroscopy (XAS) is a very reliable tool to investigate the electronic structure (unoccupied states above Fermi level) of carbon-based materials. The GO and rGO thin films are probed by near-edge X-ray absorption fine structure (NEXAFS) collected at O K-edge and C K-edge. The NEXAFS measurements were performed at a high-energy spherical grating monochromator (H-SGM) BL20A1 (TEY mode, surface-sensitive up to  $\sim 5 \text{ nm}$ ) at the national synchrotron radiation center (NSRRC), Hsinchu, Taiwan and performed at Pohang Accelerator Lab at 2A beamline in Partial electron yield (PEY, sensitive to few atomic layers). The work function and surface morphology of the deposited GO and rGO thin films were recorded by Scanning Kelvin probe microscopy (SKPM) by Bruker (Singapore). The changes in the optical band gap of GO due to reduction were measured by Agilent Cary 5000 UV-Vis-NIR spectrophotometer. Microstructural topography of GO and rGO sample films were observed by field emission scanning electron microscopy (FESEM) from Nova Nano FE-SEM 450.  $J-V$  curves of assembled DSSCs were measured by illumination of  $100 \text{ mW cm}^{-2}$  under AM 1.5 G conditions using Oriel Sol 3A, a class AAA solar simulator. The solar simulator was calibrated using NREL-certified Si solar cells before testing of DSSCs.

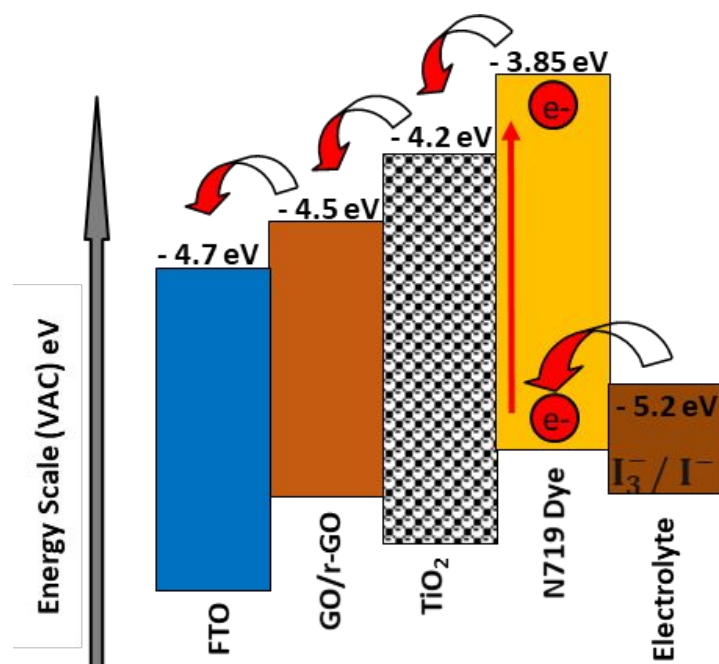

Figure S1. Charge flow in fabricated DSSC [2].

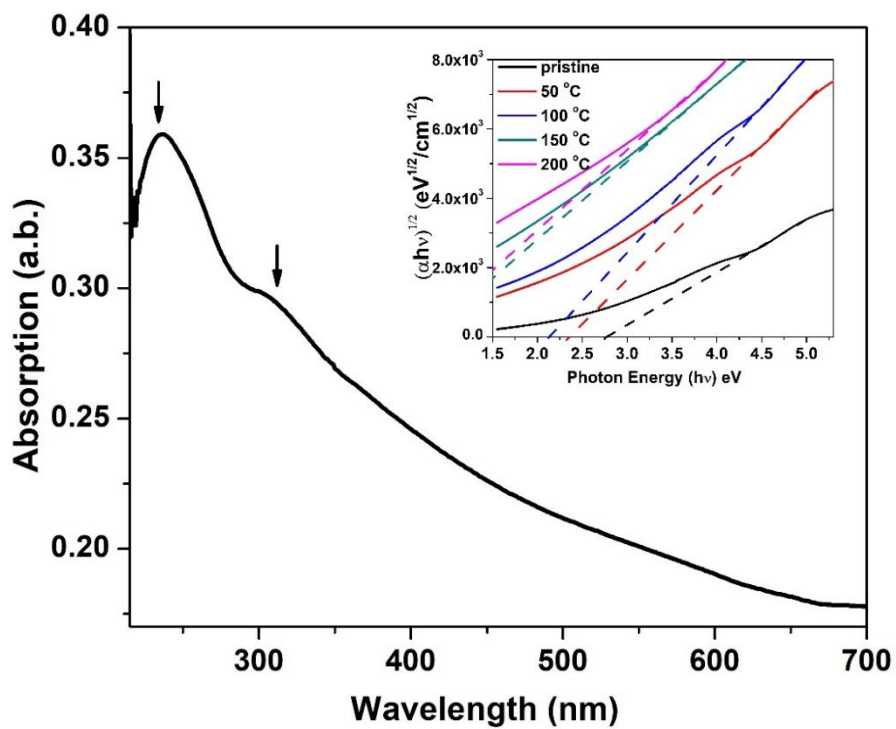

Figure S2. Absorption spectra of aqueous GO dispersion and Tauc plots for the deposited GO and rGO thin films (in the inset).

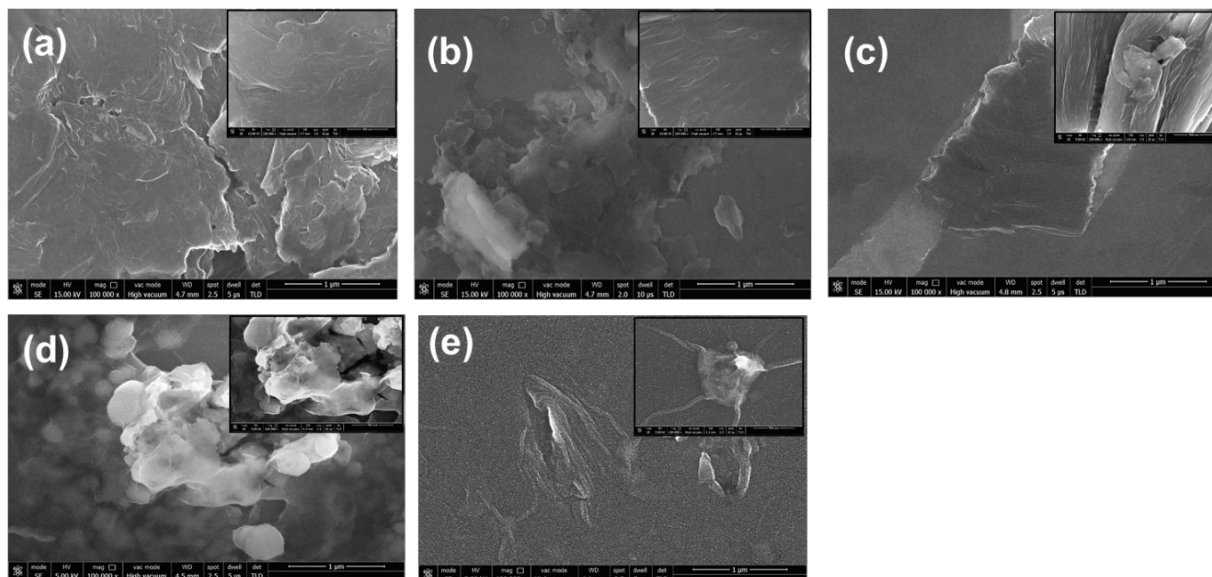

**Figure S3. FESEM Images of GO (a) Pristine and reduced at (b) 50 (c) 100, (d) 150, and (e) 200 °C.**

## References

- (1) Mustafa, M. N.; Azhari, N. A.; Sulaiman, Y. Reduced Graphene Oxide-Titanium Dioxide Compact Layer Prepared via Electrodeposition for Enhanced Performance of Dye-Sensitized Solar Cells. *Opt. Mater.* **2021**, *120*, 111475. <https://doi.org/10.1016/J.OPTMAT.2021.111475>.
- (2) Makal, P.; Das, D. Reduced Graphene Oxide-Laminated One-Dimensional TiO<sub>2</sub>-Bronze Nanowire Composite: An Efficient Photoanode Material for Dye-Sensitized Solar Cells. *ACS Omega* **2021**, *6* (6), 4362–4373. <https://doi.org/10.1021/acsomega.0c05707>.
- (3) Dhonde, M.; Sahu, K.; Murty, V. V. S. Cu-Doped TiO<sub>2</sub> Nanoparticles/Graphene Composites for Efficient Dye-Sensitized Solar Cells. *Sol. Energy* **2021**, *220*, 418–424. <https://doi.org/10.1016/J.SOLENER.2021.03.072>.
- (4) He, Y.; Zhang, Z.; Wang, W.; Fu, L. Metal Organic Frameworks Derived High-Performance Photoanodes for DSSCs. *J. Alloys Compd.* **2020**, *825*, 154089. <https://doi.org/10.1016/J.JALLCOM.2020.154089>.
